# Supplementary material
Source: HighWire-hosted journal article supplement (http://bmjopengastro.bmj.com/highwire/filestream/3623/field_highwire_adjunct_files/0/bmjgast-2023-001143supp001_data_supplement.pdf)
Supplement: bmjgast-2023-001143supp001_data_supplement.pdf [file bmjgast-2023-001143supp001_data_supplement.pdf]

## Supplemental 1

### Flowchart of selected routine EGDs

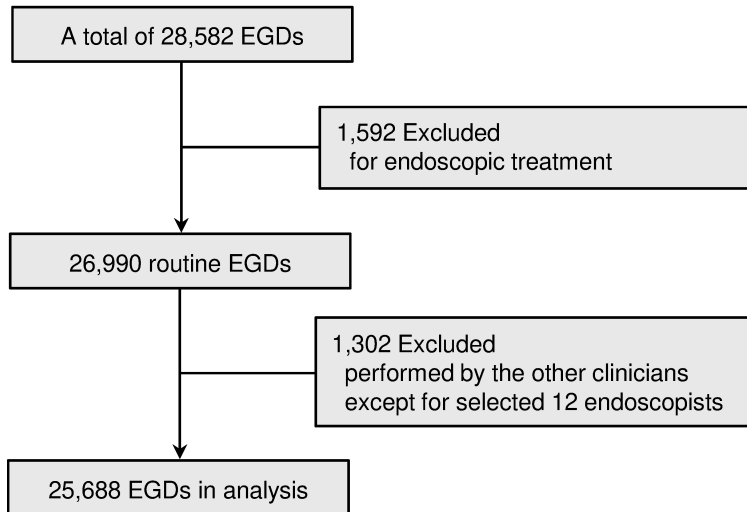

### Flowchart of selected early GCs detected on EGDs and endoscopically resected

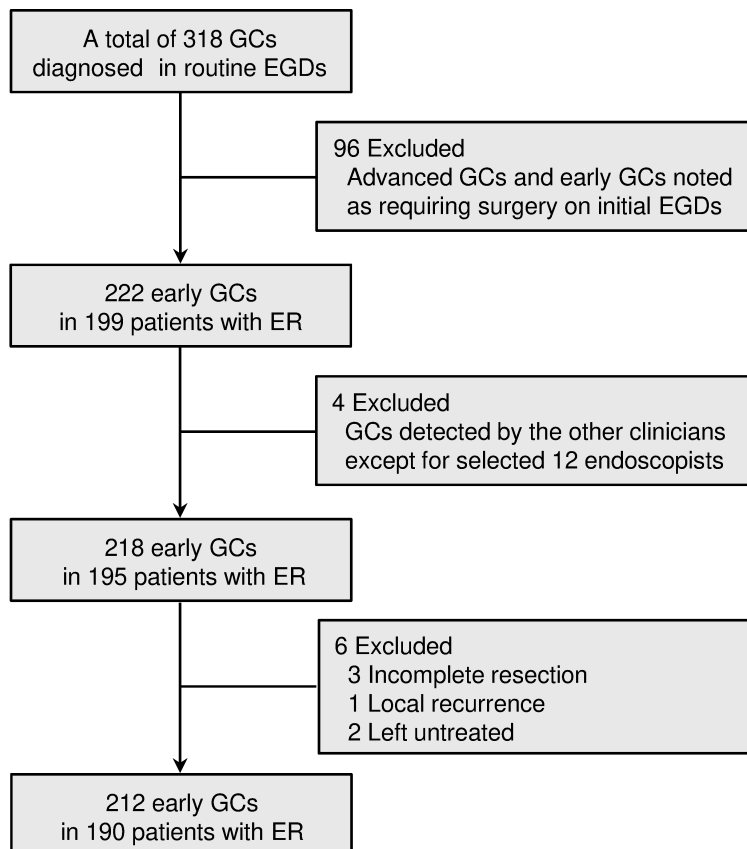

## Supplemental 2

Comparison of baseline characteristics of patients undergoing routine esophagogastroduodenoscopy and gastric cancer detection rates between in the low-detection and high-detection group plus the single highest detector

EGD, esophagogastroduodenoscopy; ER, endoscopic resection; GC, gastric cancer

|                                                 | Low          | High+Highest | P Value |
|-------------------------------------------------|--------------|--------------|---------|
| <b>Characteristics of routine EGDs, No. (%)</b> |              |              |         |
| Total                                           | 15261        | 10427        |         |
| Sex, m (%)                                      | 8404 (55.1)  | 5777 (55.4)  | 0.60    |
| Mean age (range)                                | 64.2 (16-99) | 64.8 (17-98) |         |
| Atrophy                                         |              |              |         |
| Closed (%)                                      | 3458 (23.2)  | 2103 (20.2)  | < 0.01  |
| Open (%)                                        | 5286 (34.6)  | 3667 (35.2)  | 0.38    |
| Post-gastric ER (%)                             | 863 (5.65)   | 571 (5.48)   | 0.54    |
| <b>Detected GCs, No. (%)</b>                    |              |              |         |
| Total                                           | 71 (0.47)    | 141 (1.35)   | < 0.01  |
| Tumor size (mm)                                 |              |              |         |
| 5 ≤                                             | 13 (0.085)   | 44 (0.42)    | < 0.01  |
| 6-10                                            | 15 (0.098)   | 40 (0.38)    | < 0.01  |
| ≥ 11                                            | 43 (0.28)    | 57 (0.55)    | < 0.01  |

## Supplemental 3

Comparison of baseline characteristics of patients undergoing routine esophagogastroduodenoscopy and gastric cancer detection rates between in the low-detection and high-detection group

EGD, esophagogastroduodenoscopy; ER, endoscopic resection; GC, gastric cancer

|                                                 | Low                    | High                  | P Value |
|-------------------------------------------------|------------------------|-----------------------|---------|
| <b>Characteristics of routine EGDs, No. (%)</b> |                        |                       |         |
| Total                                           | 15261                  | 7743                  |         |
| Sex, m (%)                                      | 8404 (55.1)            | 4265 (55.1)           | 0.98    |
| Mean age (range)                                | 64.2 (16-99)           | 64.3 (17-98)          |         |
| Atrophy                                         |                        |                       |         |
| Closed (%)                                      | 3458 (23.2)            | 1552 (20.0)           | < 0.01  |
| Open (%)                                        | 5286 (34.6)            | 2551 (32.9)           | < 0.05  |
| Post-gastric ER (%)                             | 863 (5.65)             | 342 (4.42)            | < 0.01  |
| <b>Detected GCs, No. (%)</b>                    |                        |                       |         |
| Total                                           | 71 (0.47)              | 64 (0.83)             | < 0.01  |
| Tumor size (mm)                                 |                        |                       |         |
| 5 ≤ } 10 ≤                                      | 13 (0.085) } 28 (0.18) | 15 (0.19) } 33 (0.43) | < 0.05  |
| 6-10 } 10 ≤                                     | 15 (0.098) } 28 (0.18) | 18 (0.23) } 33 (0.43) | < 0.05  |
| ≥ 11                                            | 43 (0.28)              | 31 (0.40)             | 0.13    |
